# Supplementary material for: Supramolecular self-assembled gold nanoparticle clusters for synergistic photothermal-chemo tumor therapy
Source: Royal Society of Chemistry journal article supplement (doi:10.1039/d3tb02822d), 2024-01-01
Supplement: d3tb02822d1.pdf [file d3tb02822d1.pdf]

Supplementary Information

**Supramolecular self-assembled gold nanoparticle clusters for synergistic photothermal-chemo tumor therapy**

Ping Wei, Ying Li, Yaling Wu, Yirang Zhang, Yanan Xiang, and Jingxiao Chen\*

School of Life Sciences and Health Engineering, Jiangnan University, Wuxi 214122,  
PR China

\* To whom correspondence should be addressed. Tel.: +86 510 85911900; Fax: +86

510 85329042

E-mail address: tomchenjx@jiangnan.edu.cn

## 1. Materials

$\beta$ -cyclodextrin ( $\beta$ -CD), triethylamine (TEA), dichloromethane (DCM), and trifluoroacetic acid (TFA) were purchased from Sinopharm Chemical Reagent Co. Ltd (Shanghai, China). 2-Naphthaleneacetic acid (2-NAA) and di-tert-butyl dicarbonate were obtained from Aladdin Reagent Co. Ltd (China). 1,8-Diamino-3,6-dioxaoctane (DADO), *N*-hydroxysuccinimide, *N*-(3-Dimethylaminopropyl)-*N*'-ethylcarbodiimide hydrochloride (EDC·HCl), and 1-hydroxybenzotriazole (HOBT) were purchased from Energy Chemical Co. Ltd (China). All other solvents and reagents were purchased from Sinopharm Chemical Reagent Co. Ltd (Shanghai, China).

## 2. Synthesis of mono-Boc-protected 1,8-diamino-3,6-dioxaoctane (<sup>m</sup>Boc-DADO)

DADO (5 mL, 34.1 mmol) was dissolved in DCM (15 mL) and stirred in an ice bath under N<sub>2</sub> atmosphere. DCM solution (10 mL) containing di-tert-butyl dicarbonate (7.4 g, 34.1 mmol) and TEA (6.5 mL, 50.2 mmol) was then added dropwise. After stirring at room temperature for 3 h, the solution was extracted with water and brine. The organic phase was collected and evaporated to obtain the <sup>m</sup>Boc-DADO. Yield (80%, colorless transparent oily liquid). <sup>1</sup>H NMR (CDCl<sub>3</sub>, 400 MHz)  $\delta$ : 5.21 (s, 1H, -NH), 3.62 (t, 2H, -CH<sub>2</sub>), 3.58-3.51 (m, 6H, -CH<sub>2</sub>), 3.38-3.25 (m, 2H, -CH<sub>2</sub>), 2.91-2.86 (t, 2H, -CH<sub>2</sub>), 1.83-1.78 (br b, 2H, -NH<sub>2</sub>), 1.44 (s, 9H, -CH<sub>3</sub>).

## 3. Synthesis of *N*-naphthaleneacetyl-1,8-diamino-3,6-dioxaoctane (NAD)

2-NAA (1 g, 5.4 mmol), HOBT (0.73 g, 5.4 mmol), EDC·HCl (2.1 g, 10.8 mmol), and TEA (0.75 mL, 5.4 mmol) were dissolved in DCM (10 mL) and stirred in an ice bath for 1 h to active the carboxyl group. Then, <sup>m</sup>Boc-DADO (2 g, 8.1 mmol) was added

into the mixture, which was stirred overnight under N<sub>2</sub> atmosphere. The resulting solution was extracted with water and brine, and the organic phase was collected, dried over anhydrous MgSO<sub>4</sub>. The product of Boc-NAD was purified by column chromatography (silica gel, ethyl acetate / DCM, 1/1, v/v). Yield (73%, white solid). <sup>1</sup>H NMR (CDCl<sub>3</sub>, 400 MHz) δ: 7.88-7.69, 7.52-7.35 (m, 7H, Ar-H), 5.98 (br s, 1H, -NH), 4.93 (br s, 1H, -NH), 3.75 (s, 2H, -CH<sub>2</sub>), 3.54-3.32 (m, 10H, -CH<sub>2</sub>), 3.24-3.17 (t, 2H, -CH<sub>2</sub>), 1.44 (s, 9H, -CH<sub>3</sub>).

The amino group of NAD was deprotected by resolving Boc-NAD (1 g, 2.4 mmol) in trifluoroacetic acid (TFA) / DCM (6 mL, 1/1, v/v) solution in an ice bath for 60 min. The solution was then extracted with saturated NaCl solution, dried over anhydrous MgSO<sub>4</sub>, and concentrated in vacuo to obtain the product. Yield (65%, white solid). <sup>1</sup>H NMR (CDCl<sub>3</sub>, 400 MHz) δ: 7.86-7.72, 7.52-7.38 (m, 7H, Ar-H), 6.32 (br s, 1H, -NH), 3.73 (s, 2H, -CH<sub>2</sub>), 3.53-3.35 (m, 10H, -CH<sub>2</sub>), 2.79-2.74 (t, 2H, -CH<sub>2</sub>), 2.01 (s, 2H, -NH<sub>2</sub>).

#### **4. Synthesis of thiol-modified cyclodextrin (CD-SH)**

β-CD (50 g, 44.1 mmol) was suspended in deionized water (450 mL), and NaOH solution (80 mL, 2.5 mol/L) was added dropwise into the mixture, which was stirred for 30 min after the solution turned apparent. Acetonitrile solution (6 mL) containing *p*-toluenesulfonylmethyl chloride (10.4 g, 54.6 mmol) was then added to the solution dropwise, and the mixture was stirred at room temperature for 3 h. The precipitate was removed, and the pH of the filtrate was adjusted to 8 with NH<sub>4</sub>Cl. The filtrate was placed into a refrigerator of 4 °C overnight to precipitate mono-6-*p*-toluenesulfonyl-CD

(CD-OTs). The crude product was purified by recrystallizing for three times from deionized water. Yield (16%, white crystal).

CD-OTs (3 g, 2.3 mmol) and thiourea (2.5 g, 32.8 mmol) were dissolved in 80% methanol/water solution (200 mL) and refluxed for two days. The resulting solution was concentrated and followed by precipitated with acetone. The obtained white precipitate was dissolved in NaOH solution (10 wt%) and stirred at 50 °C for 5 h. After the reaction, the solution was cooled to room temperature, and the pH was adjusted to 2 with dilute HCl. Trichloroethylene (5 mL, 55.7 mmol) was then added, and the mixture was stirred overnight. The white precipitate was filtered and dissolved into boiling water. The solution was concentrated to 30 mL to remove excess trichloroethylene, and ethanol (70 mL) was added to precipitate the product CD-SH. Yield (6.4%, white crystal). <sup>1</sup>H NMR (DMSO-*d*<sub>6</sub>, 400 MHz)  $\delta$ : 5.88-5.55 (m, 14H, OH-2,3), 4.92-4.77 (br d, 7H, H-1), 4.55-4.27 (m, 6H, OH-6), 3.79-3.48 (m, 26H, H-3,5,6), 3.45-3.20 (m, overlapping with HDO, OH-2,4), 3.02-2.71 (m, 2H, H-6), 2.04-1.92 (m, 1H, -SH).

**Table S1.** Regulation of the average size of AuNCs by adjusting the molar ratios of host/guest molecules.

|                   | Molar ratios of $\beta$ -CD/2-NAA |                  |                 |                 |                 |                  |                  |                  |
|-------------------|-----------------------------------|------------------|-----------------|-----------------|-----------------|------------------|------------------|------------------|
|                   | 4:1                               | 2:1              | 4:3             | 1:1             | 4:5             | 2:3              | 4:7              | 1:2              |
| Average size (nm) | 167.1 $\pm$ 22.5                  | 318.0 $\pm$ 21.3 | 195.2 $\pm$ 8.3 | 147.9 $\pm$ 5.9 | 184.4 $\pm$ 7.4 | 268.4 $\pm$ 16.2 | 284.2 $\pm$ 13.7 | 293.4 $\pm$ 12.3 |
| PDI               | 0.497                             | 0.358            | 0.348           | 0.213           | 0.384           | 0.421            | 0.442            | 0.401            |

**Table S2.**  $\zeta$ -potential of AuNPs, AuNPs-CD, and AuNCs.

|                         | AuNPs         | AuNPs-CD       | AuNCs         |
|-------------------------|---------------|----------------|---------------|
| $\zeta$ -potential (mV) | -41 $\pm$ 1.4 | -3.2 $\pm$ 0.5 | -23 $\pm$ 2.6 |

**Table S3.** Drug encapsulation efficiency (EE) and drug loading lever (DL) of DOX@AuNCs.

|           | EE (%)         | DL (%)        |
|-----------|----------------|---------------|
| DOX@AuNCs | 92.2 $\pm$ 3.2 | 2.9 $\pm$ 0.4 |

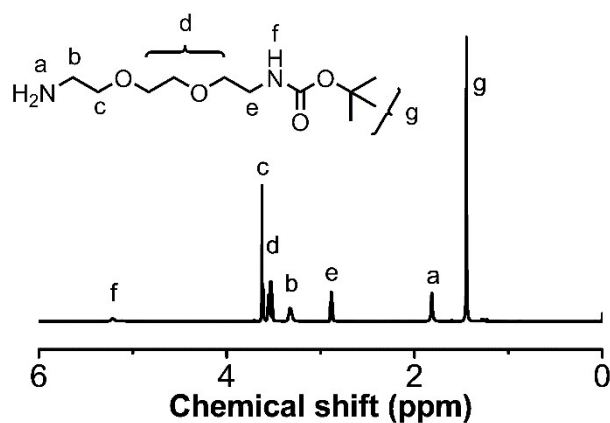

**Fig. S1** Chemical structure and  $^1\text{H}$  NMR spectrum of  $^m\text{Boc-DADO}$  in  $\text{CDCl}_3$ .

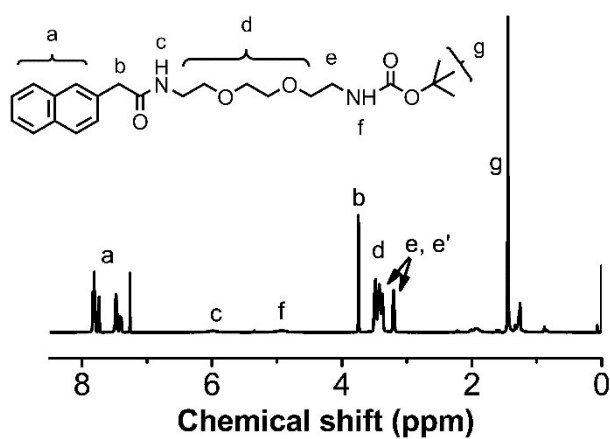

**Fig. S2** Chemical structure and  $^1\text{H}$  NMR spectrum of  $\text{Boc-NAD}$  in  $\text{CDCl}_3$ .

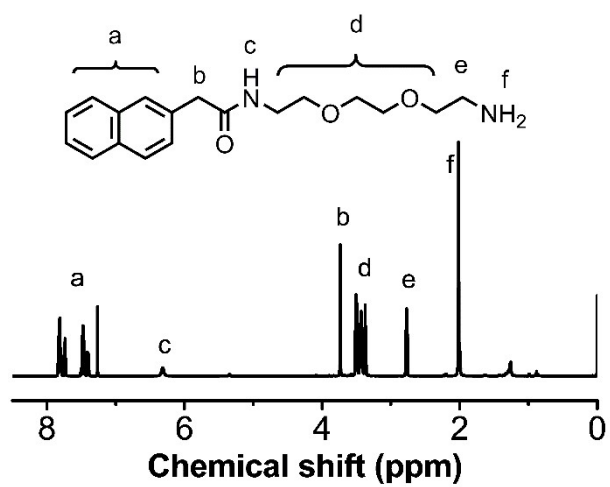

**Fig. S3** Chemical structure and  $^1\text{H}$  NMR spectrum of  $\text{NAD}$  in  $\text{CDCl}_3$ .



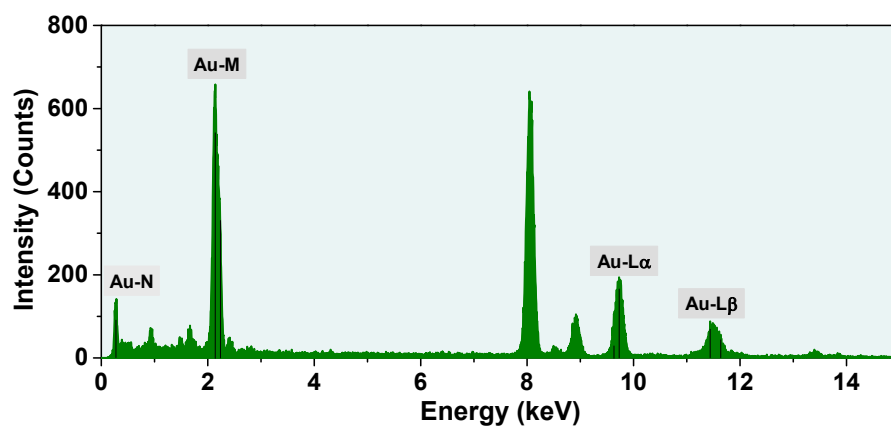

**Fig. S7** Energy dispersive X-ray spectroscopy (EDS) spectrum of the AuNCs.

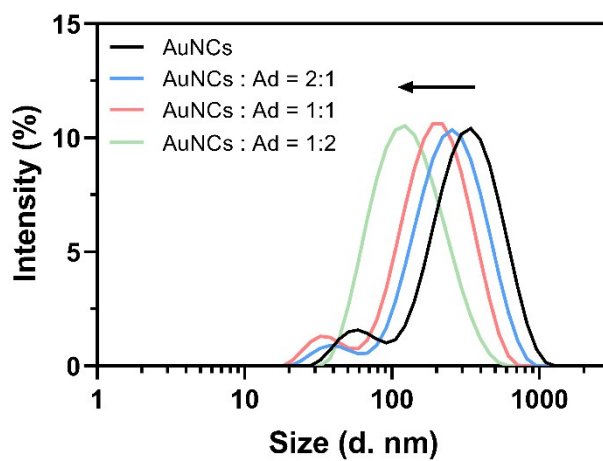

**Fig. S8** The size variation of AuNCs with the addition of adamantanamine (Ad).



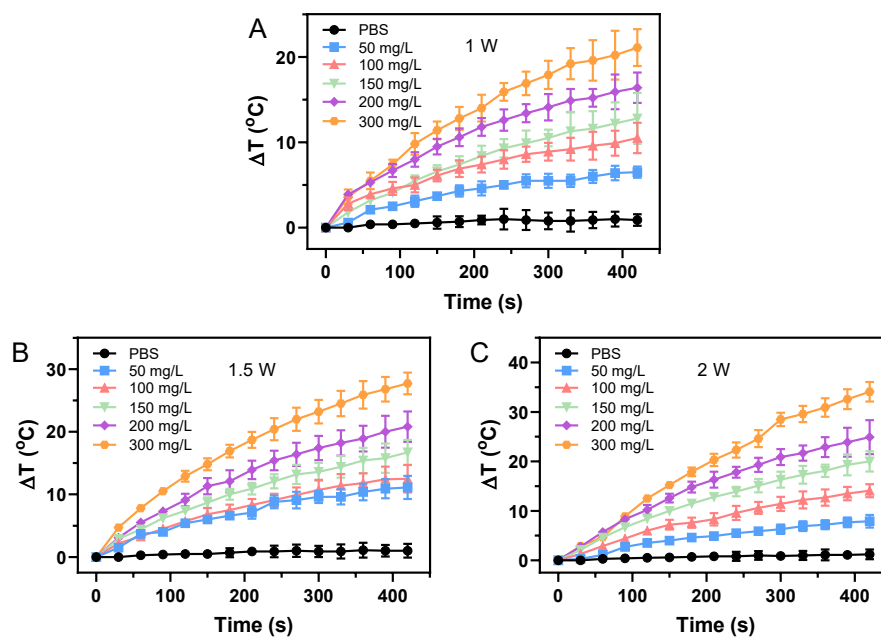

**Fig. S9** The NIR-induced hyperthermia of AuNCs with different irradiation times, concentrations, and powers: (a) 1, (b) 1.5, and (c) 2 W/cm<sup>2</sup>.

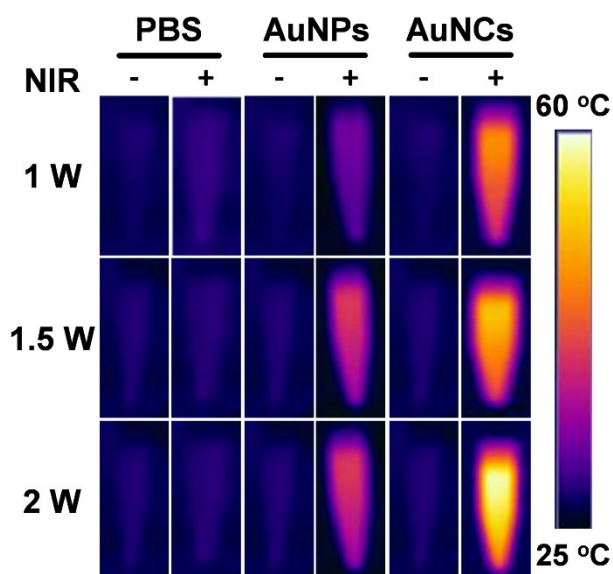

**Fig. S10** Real-time thermal images of PBS, AuNPs, and AuNCs (200 mg/L) irradiated with (+) or without (-) the NIR laser (808 nm, 1, 1.5, and 2 W/cm<sup>2</sup> for 5 min).

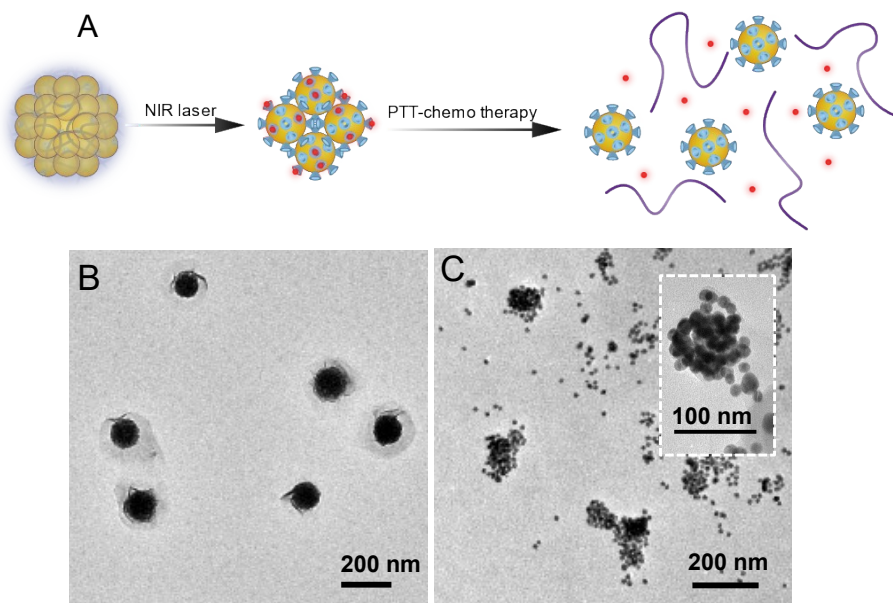

**Fig. S11** (A) Schematic illustration of NIR laser-triggered disassembly and accelerated DOX release. TEM images of DOX@AuNCs (B) before and (C) after NIR irradiation for 10 min.

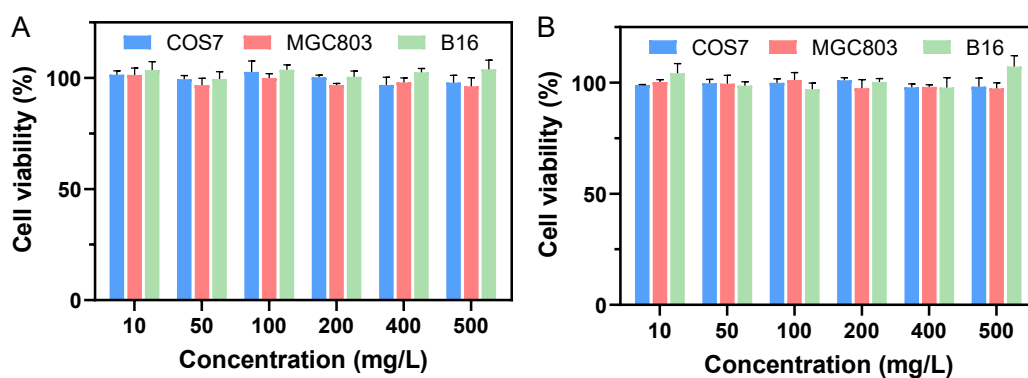

**Fig. S12** Cytotoxicity of (A) AuNPs and (B) AuNCs against COS7, MGC803, and B16 cells. Error bar indicated the mean  $\pm$  SD (n = 3).

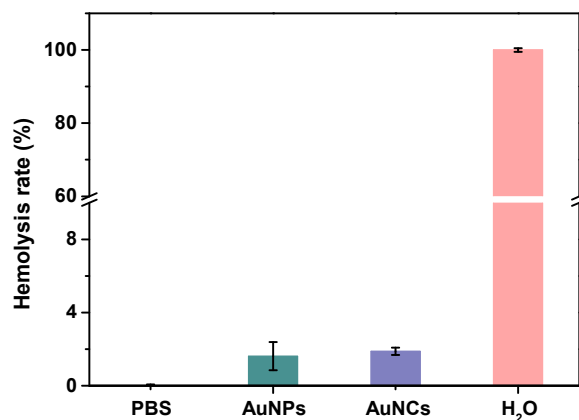

**Fig. S13** Hemolysis rates of AuNPs and AuNCs.

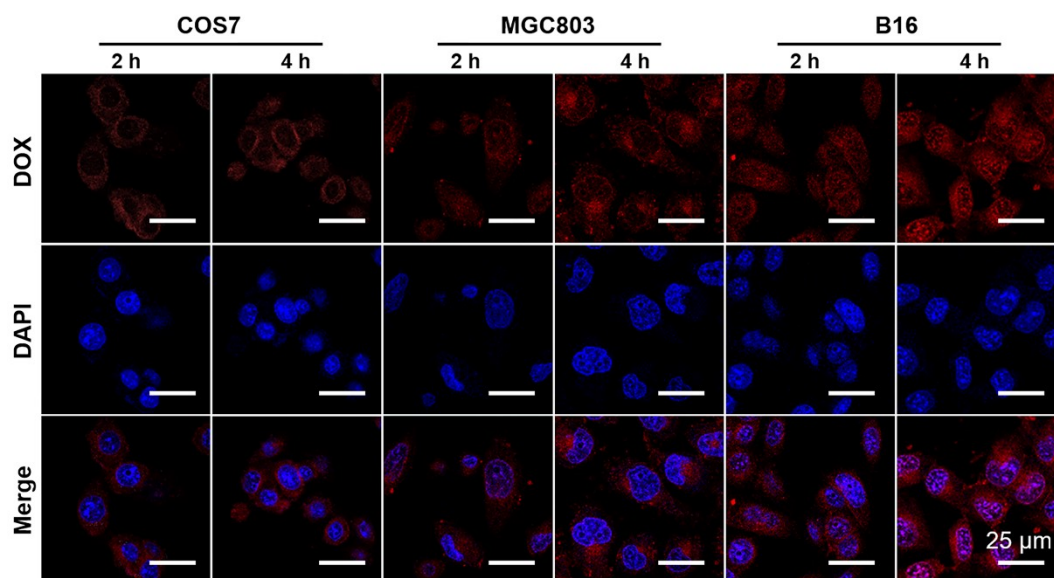

**Fig. S14** The CLSM images of COS7, MGC803, and B16 cells incubated with DOX@AuNCs for 2 and 4 h. The fluorescence signals represent the DOX (red) internalized into the cells and nucleus (blue) stained with DAPI.

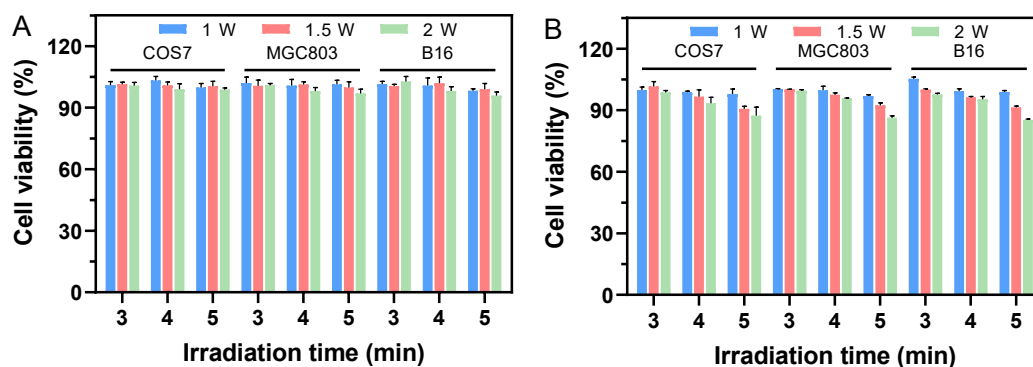

**Fig. S15** Photothermal cytotoxicity of (A) NIR light and (B) AuNPs against COS7, MGC803, and B16 cells. Error bar indicated the mean  $\pm$  SD (n = 3).

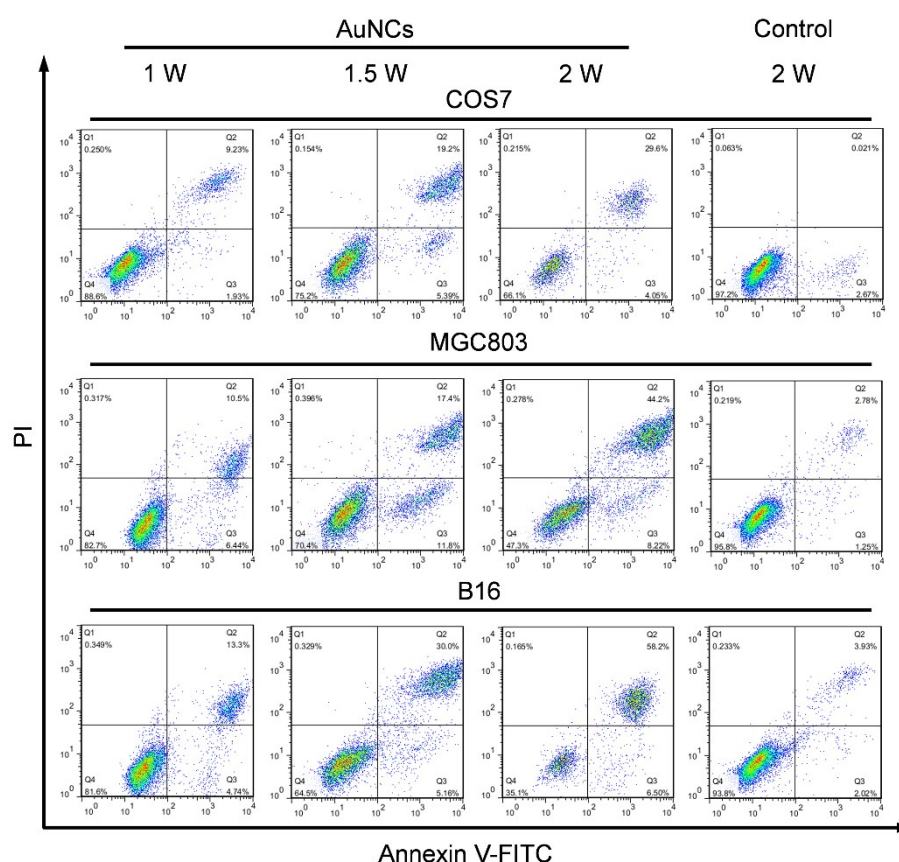

**Fig. S16** Flow cytometry analysis of cell apoptosis of COS7, MGC803, and B16 cells incubated with AuNCs (200 mg/L), and then exposed to NIR light for 5 min with different powers (1, 1.5, and 2 W/cm²). The control represented the cells were incubated without AuNCs but exposed to NIR light.

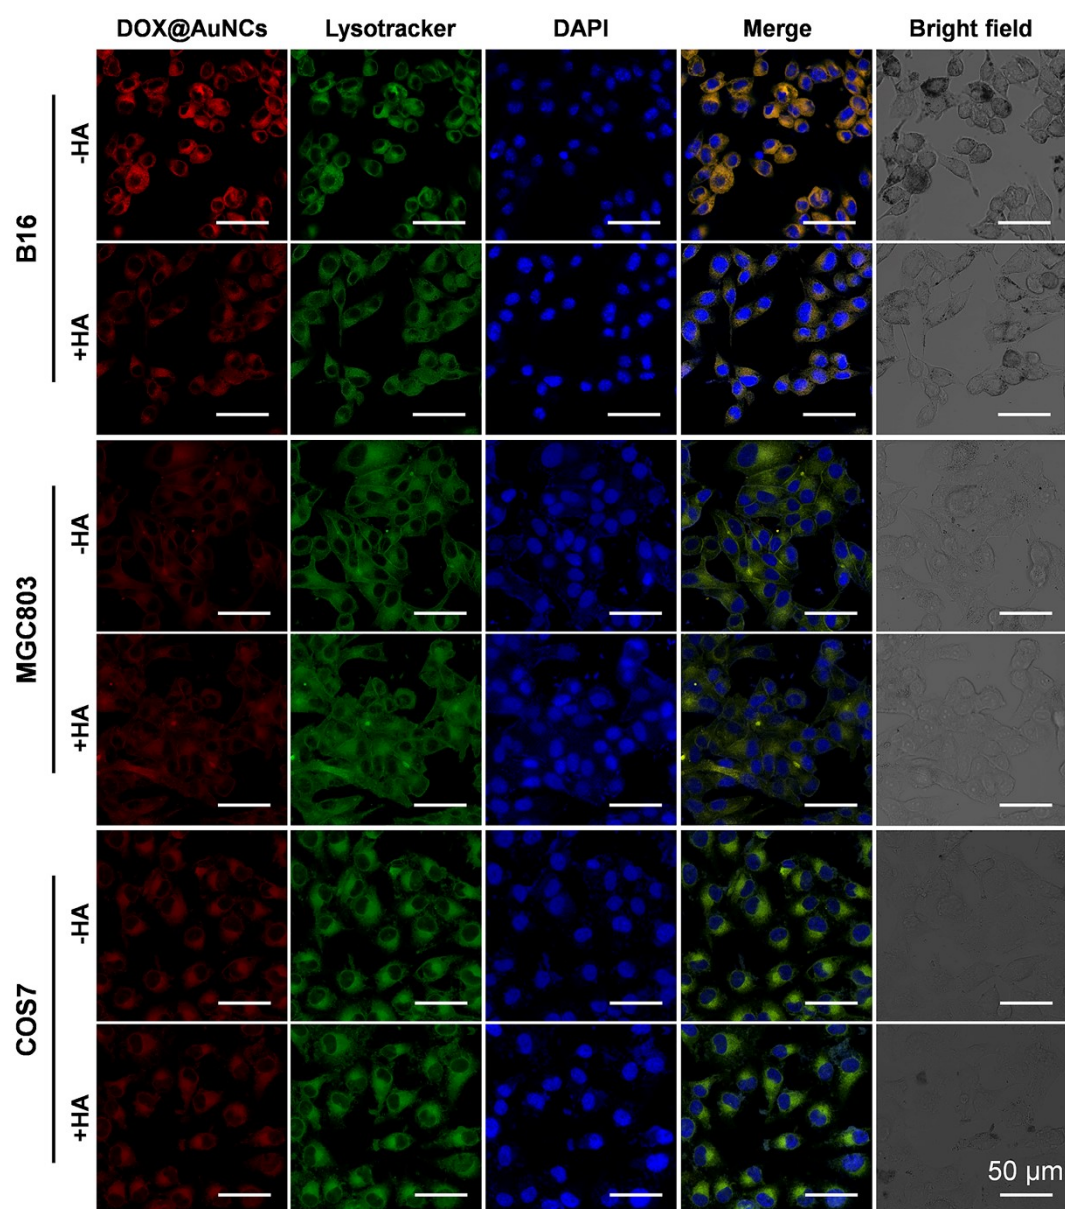

**Fig. S17** The CLSM images of B16, MGC803, and COS7 cells incubated with DOX@AuNCs with or without HA pre-treatment.



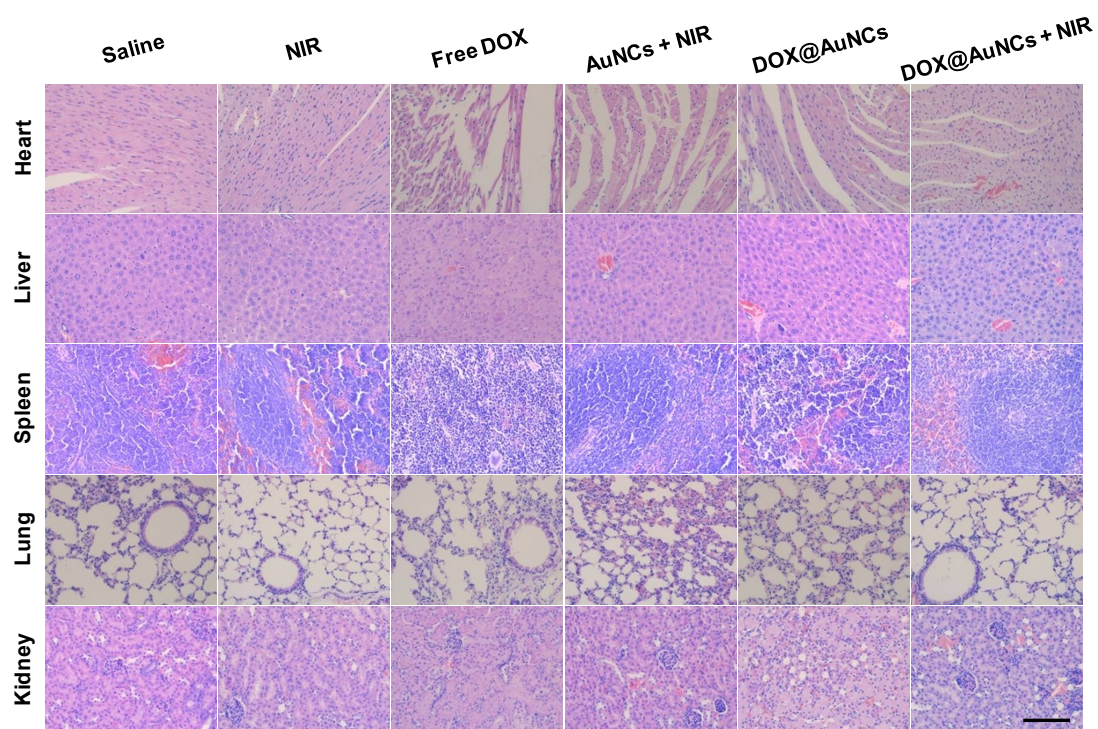

**Fig. S18** Representative H&E staining images of major organs including heart, liver, spleen, lung, and kidney collected from tumor-bearing mice after the treatment for two weeks. Scale bar: 100  $\mu\text{m}$ .
